# Supplementary material for: Concomitant Versus Individual Administration of Antithrombin and Thrombomodulin for Sepsis-Induced Disseminated Intravascular Coagulation: A Nationwide Japanese Registry Study
Source: PubMed Central journal article supplement — Clin Appl Thromb Hemost. 2018 Feb 22;24(5):734–40. doi: 10.1177/1076029618755948 (PMC6714866; doi:10.1177/1076029618755948), 2018-02-22
Supplement: Supplementary_material.pdf [file Supplementary_material.pdf]

## Supplementary material

**Table S1** The 32 variables used to calculate propensity score in the logistic regression model

---

|                                   |                                                                                                                                                              |
|-----------------------------------|--------------------------------------------------------------------------------------------------------------------------------------------------------------|
| Patient characteristics           | 1) Age, 2) sex                                                                                                                                               |
| Illness severity                  | 3) SIRS score, 4) SOFA score, 5) APACHE II score, 6) JAAM DIC score, 7) ISTH overt DIC score, 8) positive blood culture                                      |
| 9) Source of ICU admission        | Emergency department/ward/other hospital                                                                                                                     |
| Pre-existing condition            | 10) Liver insufficiency, 11) chronic heart failure, 12) chronic respiratory disorder, 13) chronic hemodialysis, 14) immunocompromised                        |
| New organ dysfunction             | 15) Respiratory, 16) cardiovascular, 17) renal, 18) hepatic, 19) coagulation                                                                                 |
| 20) ICU characteristics           | Closed ICU/open ICU/other                                                                                                                                    |
| 21) Primary source of infection   | Abdomen/lung/urinary tract/bone+soft tissue/central nervous system/other+unknown                                                                             |
| 22) Causal microorganisms         | Gram-positive bacteria/Gram-negative bacteria/mixed organisms/other/unknown                                                                                  |
| Anticoagulant therapy not for DIC | 23) Nafamostat mesilate for renal replacement therapy, 24) heparin for venous thromboembolism prophylaxis, 25) warfarin, 26) anti-platelet drugs, 27) others |
| Other therapeutic interventions   | 28) Immunoglobulin, 29) low-dose steroid, 30) renal replacement therapy, 31) PMX-DHP, 32) surgical intervention                                              |

---

*SIRS* Systemic Inflammatory Response Syndrome; *SOFA* Sequential Organ Failure Assessment; *APACHE* Acute Physiology and Chronic Health Evaluation; *JAAM*

Japanese Association for Acute Medicine; *DIC* disseminated intravascular coagulation; *ISTH* International Society on Thrombosis and Hemostasis; *ICU* intensive

care unit; *PMX-DHP* polymyxin B direct hemoperfusion
